# Supplementary material for: Designed synthesis of an sp2 carbon-conjugated fluorescent covalent organic framework for selective detection of Fe3+
Source: Royal Society of Chemistry journal article supplement (doi:10.1039/d2ay00626j), 2022-01-01
Supplement: d2ay00626j1.pdf [file d2ay00626j1.pdf]

## **Supporting Information**

# **Designed Synthesis of a $sp^2$ Carbon-Conjugated Fluorescent Covalent Organic Framework for Selective Detection of $Fe^{3+}$**

Jia You, Qianqian Kong, Cuiling Zhang\* and Yuezhong Xian\*

Shanghai Engineering Research Center of Molecular Therapeutics and New Drug Development, Department of Chemistry, School of Chemistry and Molecular Engineering, East China Normal University, Shanghai 200241, China.

E-mails: clzhang@chem.ecnu.edu.cn, yzxian@chem.ecnu.edu.cn.

## Table of Content

|                                                                                                               |     |
|---------------------------------------------------------------------------------------------------------------|-----|
| <b>Fig. S1.</b> $^1\text{H}$ NMR of TAN-Br                                                                    | S3  |
| <b>Fig. S2.</b> $^1\text{H}$ NMR of ThDAN                                                                     | S4  |
| <b>Table S1.</b> Synthesis of the $\text{COF}_{\text{TFPPy-ThDAN}}$ under different conditions                | S5  |
| <b>Fig. S3.</b> PXRD spectra of different products                                                            | S6  |
| <b>Fig. S4.</b> SEM images of $\text{COF}_{\text{TFPPy-ThDAN}}$                                               | S7  |
| <b>Fig. S5.</b> TGA curve of $\text{COF}_{\text{TFPPy-ThDAN}}$                                                | S8  |
| <b>Fig. S6.</b> Long-term fluorescence stability of $\text{COF}_{\text{TFPPy-ThDAN}}$ .                       | S9  |
| <b>Fig. S7.</b> Responses of TFPPy and ThDAN to $\text{Fe}^{3+}$ .                                            | S10 |
| <b>Fig. S8.</b> The change in fluorescence decay curve of $\text{COF}_{\text{TFPPy-ThDAN}}$ .                 | S11 |
| <b>Fig. S9.</b> The reusable performance of $\text{COF}_{\text{TFPPy-ThDAN}}$ for $\text{Fe}^{3+}$ detection. | S12 |

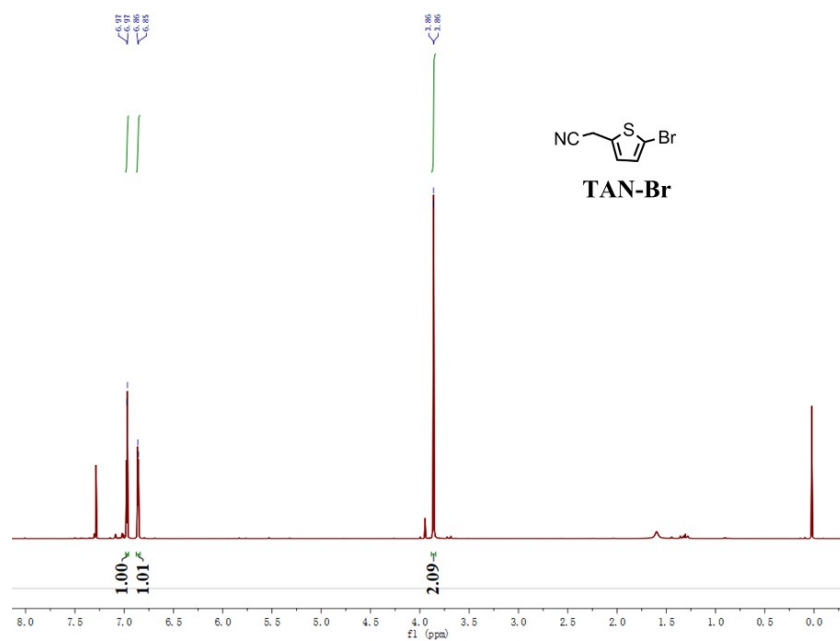

**Figure S1.**  $^1\text{H}$  NMR of TAN-Br.

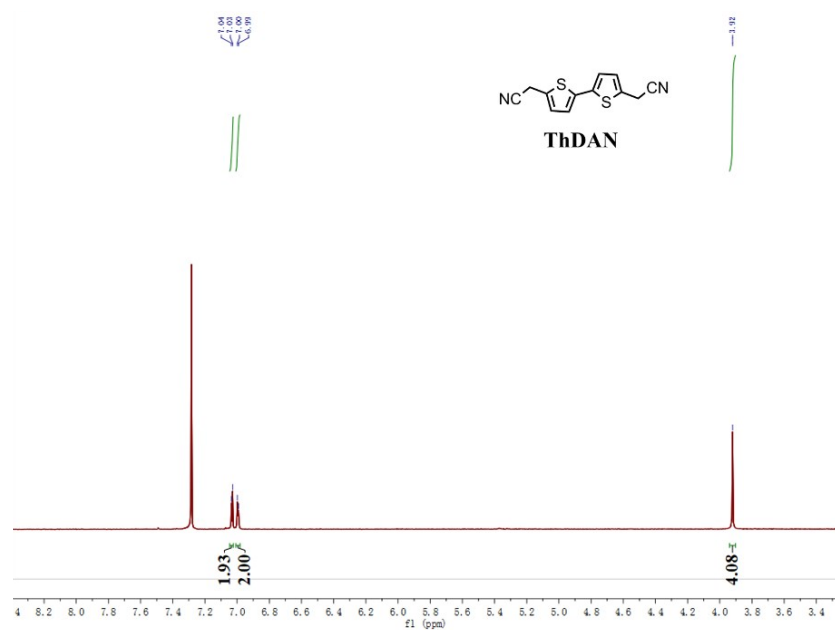

**Figure S2.** <sup>1</sup>H NMR of ThDAN.

**Table S1.** Synthesis of the COF<sub>TFPPy-ThDAN</sub> under different conditions.

| No. | Solvent                          | Ratio | Temperature | Catalyst                        | Product              |
|-----|----------------------------------|-------|-------------|---------------------------------|----------------------|
| 1   | <i>o</i> -DCB/<br><i>n</i> -BuOH | 1/1   | 120 °C      | NaOH                            | Amorphous<br>polymer |
| 2   | <i>o</i> -DCB/<br><i>n</i> -BuOH | 1/1   | 120 °C      | DBU                             | Amorphous<br>Polymer |
| 3   | <i>o</i> -DCB/<br><i>n</i> -BuOH | 1/1   | 120 °C      | Cs <sub>2</sub> CO <sub>3</sub> | Amorphous<br>Polymer |
| 4   | 1,4-dioxane/<br>Mesitylene       | 1/1   | 120 °C      | NaOH                            | Amorphous<br>Polymer |
| 5   | 1,4-dioxane/<br>Mesitylene       | 1/1   | 120 °C      | DBU                             | Amorphous<br>Polymer |
| 6   | 1,4-dioxane/<br>Mesitylene       | 1/1   | 120 °C      | Cs <sub>2</sub> CO <sub>3</sub> | Poor crystallinity   |
| 7   | 1,4-dioxane/<br>Mesitylene       | 1/1   | 120 °C      | Cs <sub>2</sub> CO <sub>3</sub> | Amorphous<br>Polymer |
| 8   | 1,4-dioxane/<br>Mesitylene       | 1/1   | 120 °C      | Cs <sub>2</sub> CO <sub>3</sub> | Medium crystallinity |
| 9   | 1,4-dioxane/<br>Mesitylene       | 1/1   | 120 °C      | Cs <sub>2</sub> CO <sub>3</sub> | High crystallinity   |
| 10  | 1,4-dioxane/<br>Mesitylene       | 1/1   | 120 °C      | Cs <sub>2</sub> CO <sub>3</sub> | Medium crystallinity |

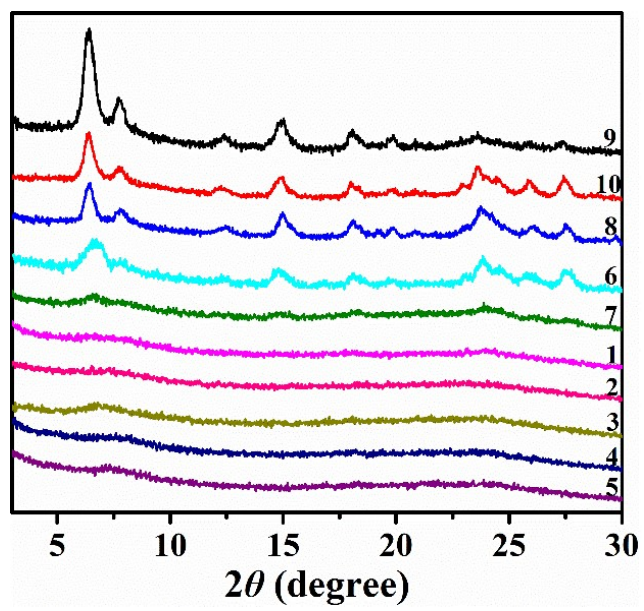

**Figure S3.** PXRD spectra of products under different synthesis conditions (the numbers correspond to the serial numbers in Table S1).

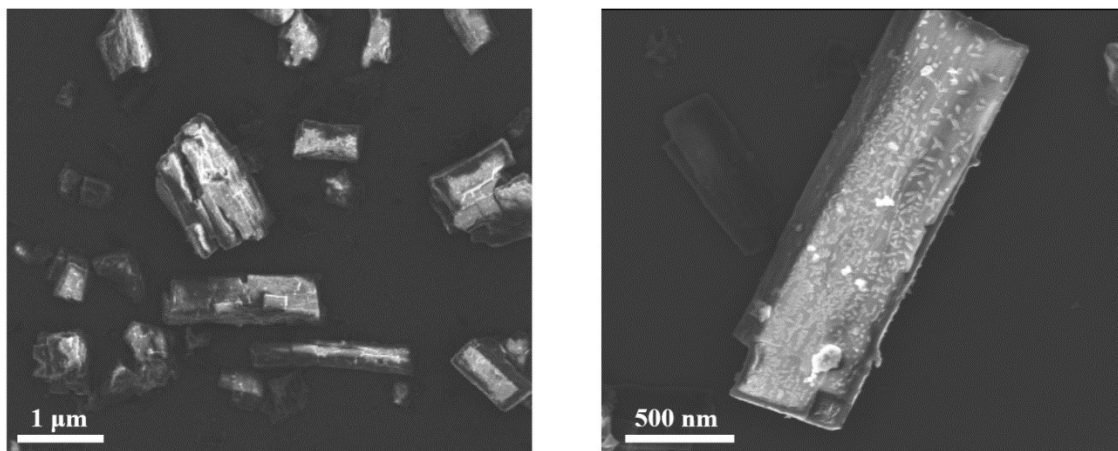

**Figure S4.** SEM images of COF<sub>TFPPy-ThDAN</sub>.

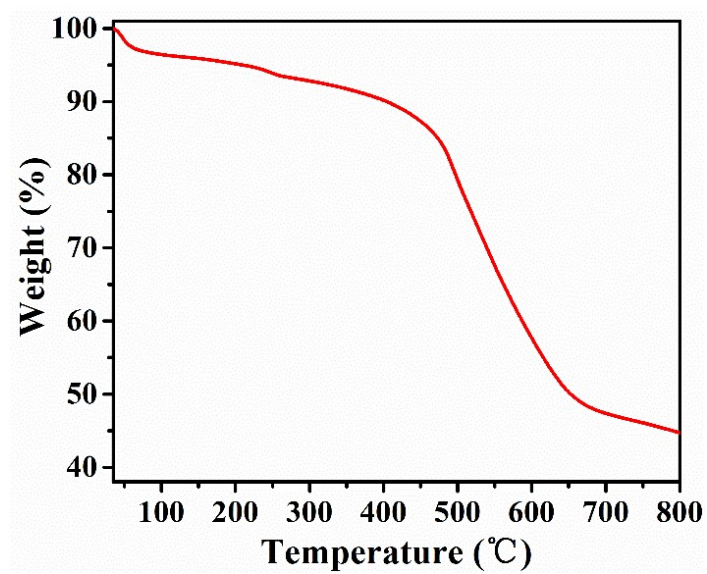

**Figure S5.** Thermogravimetric analysis curve of COF<sub>TFPPy-ThDAN</sub>.



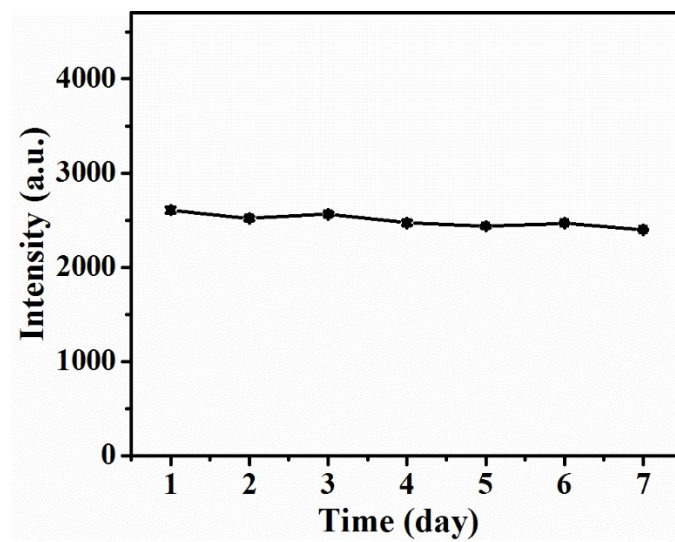

**Figure S6.** The fluorescence stability of COF<sub>TFPPy-ThDAN</sub> within 7 days.

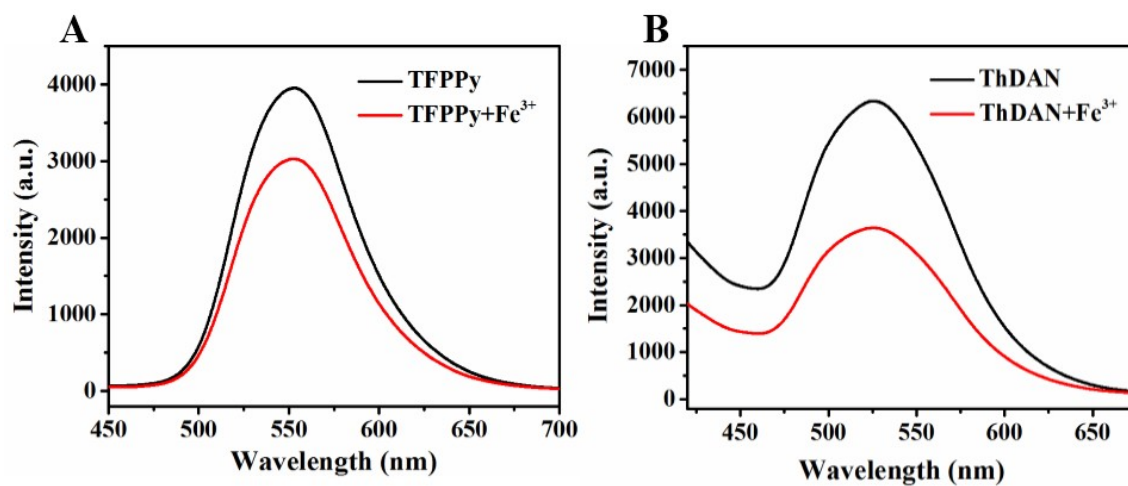

**Figure S7.** Fluorescence responses of TFPPy and ThDAN towards  $\text{Fe}^{3+}$ . The concentration of  $\text{Fe}^{3+}$  is  $200 \mu\text{M}$ .

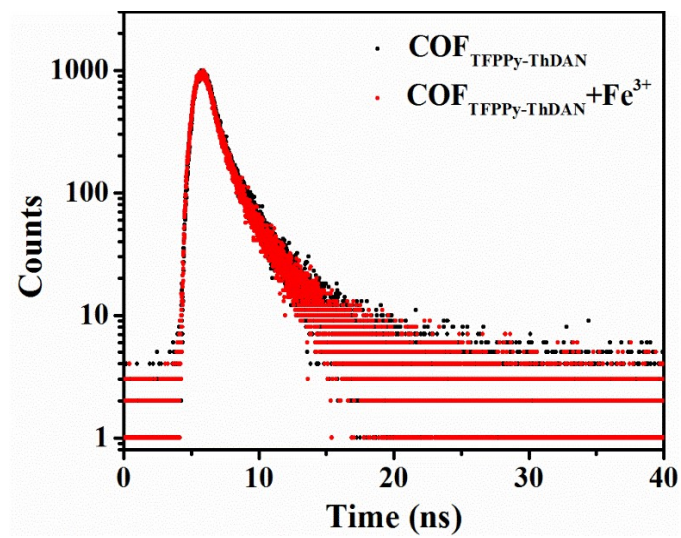

**Figure S8.** Fluorescence decay curves of  $\text{COF}_{\text{TFPPy-ThDAN}}$  before and after adding 200  $\mu\text{M}$   $\text{Fe}^{3+}$ .

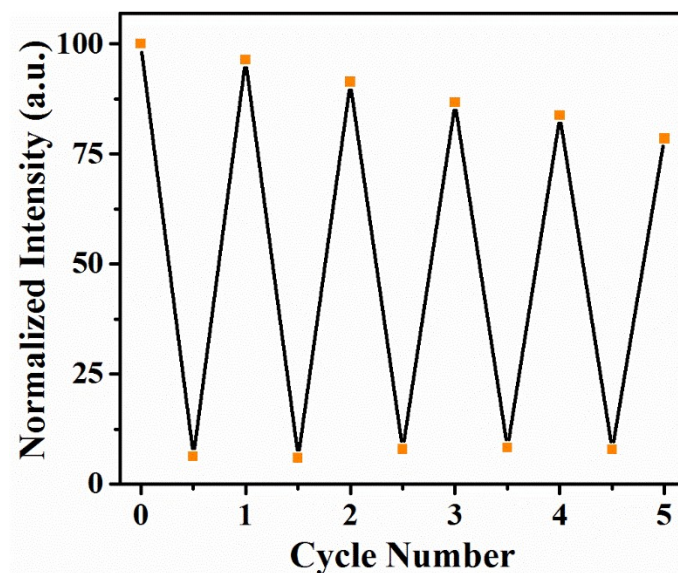

**Figure S9.** The reusable performance of COF<sub>TFPPy-ThDAN</sub> for Fe<sup>3+</sup> detection. The concentration of Fe<sup>3+</sup> is 200  $\mu$ M.
